**A.**

|         |                                                              |     |
|---------|--------------------------------------------------------------|-----|
| Xenopus | MTQD YDNKR PVLVLQNDGLYQQRRSYTN EDEAWKSFLENPLTAAATKAMMS       | 50  |
| Human   | MTQEYDNKR PVLVLQNEALYPQRRSYTS EDEAWKSFLENPLTAAATKAMMS        | 50  |
| Mouse   | MTQEYDNKR PVLVLQNEALYPQRRSYTS EDEAWKSFLENPLTAAATKAMMS        | 50  |
| Xenopus | INGDEDSAAALGLLYDYKVPREERRLSAAKQEHDHADHEHSKRNGLPQIN           | 100 |
| Human   | INGDEDSAAALGLLYDYKVPREERRSS T AKPEVEHPEPE D HSKRNSIPIVT      | 100 |
| Mouse   | INGDEDSAAALGLLYDYKVPREERRSS AVKPEGEHPEPEHSKRNSIPNV T         | 100 |
| Xenopus | EQALLP - -DNRVQVLKTVPFNIVVPLA NQ - -VDKRGHLTT PDTTAAAVSIA    | 146 |
| Human   | EQPLISAGENRVQVLKNVPFNIVLPHG NQLGIDKRGHLTAPDTTVTV SIA         | 150 |
| Mouse   | EQPLISAGENRVQVLKNVPFNIVLPHS NQLGIDKRGHLTAPDTTVTV SIA         | 150 |
| Xenopus | - - - HPIKTES QSHCF SVGLQS - VFHT EPTERI VAFDRAVPSDHFITSN NQ | 191 |
| Human   | TMPTHSIKTEET QPHGF AVGIPPAVYHP EPTERVVVFDRN LNTDQFSSGA Q     | 200 |
| Mouse   | TMPTHSIKTEI QPHGF AVGIPPAVYHS EPTERVVVFDRS LST DQFSSGT Q     | 200 |
| Xenopus | PPNSQRRRTPDSTFSETYKEDVPEVFFFP PDL SLR MGSMNSEDYVFD SVAGN     | 241 |
| Human   | APNAQRRTPDSTFSETFKEGVQEVFFPS DL SLR MPMNSEDYVFD SVSGN        | 250 |
| Mouse   | PPNAQRRTPDSTFSETFKEGVQEVFFPS E L SLR MPMNSEDYVFD NVSGN       | 250 |
| Xenopus | NFEY TLEASKSLR PKPGDSTMTYLNKGQFYPI TLKEI GSNKGIHHPISKV       | 291 |
| Human   | NFEY TLEASKSLR QKPGDSTMTYLNKGQFYPI TLKEV SSS EGIHHPISKV      | 300 |
| Mouse   | NFEY TLEASKSLR QK QGDSTMTYLNKGQFYPI VTLKEG S SNEG I HHPISKV  | 300 |
| Xenopus | RSVIMVVFADDKSREDQLRHWKYWHSRQHTAKQRCIDIADYKESFNTISN           | 341 |
| Human   | RSVIMVVF AEDKSREDQLRHWKYWHSRQHTAKQRCIDIADYKESFNTISN          | 350 |
| Mouse   | RSVIMVVF AEDKSREDQLRHWKYWHSRQHTAKQRCIDIADYKESFNTISN          | 350 |
| Xenopus | IEEIAYN AISFTWDL NDEGKVFISV NCLSTDFSSQKGVKGLPLNL QIDTY       | 391 |
| Human   | IEEIAYN AISFTWDI NDEAKVFI SV NCLSTDFSSQKGVKGLPLNI QV DTY     | 400 |
| Mouse   | IEEIAYN AISFTWDI NDEAKVFI SV NCLSTDFSSQKGVKGLPLNI QIDTY      | 400 |
| Xenopus | SYNNRSNKPVHRAYCQIKVFCDKGAERKIRDEERKQS KRKV QDVKVGLL P        | 441 |
| Human   | SYNNRSNKPVHRAYCQIKVFCDKGAERKIRDEERKQS KRKVSDVKV P L L P      | 450 |
| Mouse   | SYNNRSNKPVHRAYCQIKVFCDKGAERKIRDEERKQS KRKVSDVKV Q L L P      | 450 |
| Xenopus | THKRTDITVFKPMM DLDLTQPVLFI PDVHFANLQR T THVLPISPEDEMEGEL     | 491 |
| Human   | SHKRM DITVFKPFI DLDLTQPVLFI PDVHFANLQRGTHVLPISA SEELEGE -    | 499 |
| Mouse   | SHKRTDITVFKPFL DLDLTQPVLFI PDVHF TNLQRGS SHVLSL PSEELEGE -   | 499 |
| Xenopus | NPGMKRLPFSPEEDFNTPP - AKLP RVD EPKRVLLYVRRET EEFVDALMLK      | 540 |
| Human   | GSV LKRG P YGTEDDFAVPPS T KLA RIEEPKRVLLYVRKESEEFVDALMLK     | 549 |
| Mouse   | GSV LKRG PFGTEDDFGVPP PAKL T RT EEPKRVLLYVRKESEEFVDALMLK     | 549 |
| Xenopus | TPTL KGLMEAVSEKYEVP I EKI GKI FKKCKKGI L VNMDDNI I KHYSNEDT  | 590 |
| Human   | TPSL KGLMEAI SDKYDVP HDKI GKI FKKCKKGI L VNMDDNI VKHYSNEDT   | 599 |
| Mouse   | TPSL KGLMEAI SDKYDVP HDKI GKI FKKCKKGI L VNMDDNI VKHYSNEDT   | 599 |
| Xenopus | FHLQIEESGGSYKLT L TEI                                        | 609 |
| Human   | FQLQIEEAGGSYKLT L TEI                                        | 618 |
| Mouse   | FQLQIEEAGGSYKLT L TEI                                        | 618 |

Supplementary  
Figure 1  
Tao et al.

## B.

| <b>Full Length Factor</b> | <b>hGRHL1</b> | <b>mGRHL1</b> | <b>dGRH</b> | <b>ceGRH</b> |
|---------------------------|---------------|---------------|-------------|--------------|
| <b>Identity (%)</b>       | <b>82</b>     | <b>82</b>     | <b>34</b>   | <b>34</b>    |
| <b>Similarity(%)</b>      | <b>87</b>     | <b>87</b>     | <b>42</b>   | <b>44</b>    |

| <b>DNA binding domain</b> | <b>hGRHL1</b> | <b>mGRHL1</b> | <b>dGRH</b> | <b>ceGRH</b> |
|---------------------------|---------------|---------------|-------------|--------------|
| <b>Identity(%)</b>        | <b>96</b>     | <b>99</b>     | <b>57</b>   | <b>57</b>    |
| <b>Similarity(%)</b>      | <b>99</b>     | <b>97</b>     | <b>67</b>   | <b>69</b>    |

| <b>Dimer domain</b>  | <b>hGRHL1</b> | <b>mGRHL1</b> | <b>dGRH</b> | <b>ceGRH</b> |
|----------------------|---------------|---------------|-------------|--------------|
| <b>Identity(%)</b>   | <b>85</b>     | <b>85</b>     | <b>41</b>   | <b>38</b>    |
| <b>Similarity(%)</b> | <b>93</b>     | <b>92</b>     | <b>54</b>   | <b>56</b>    |

**A.**

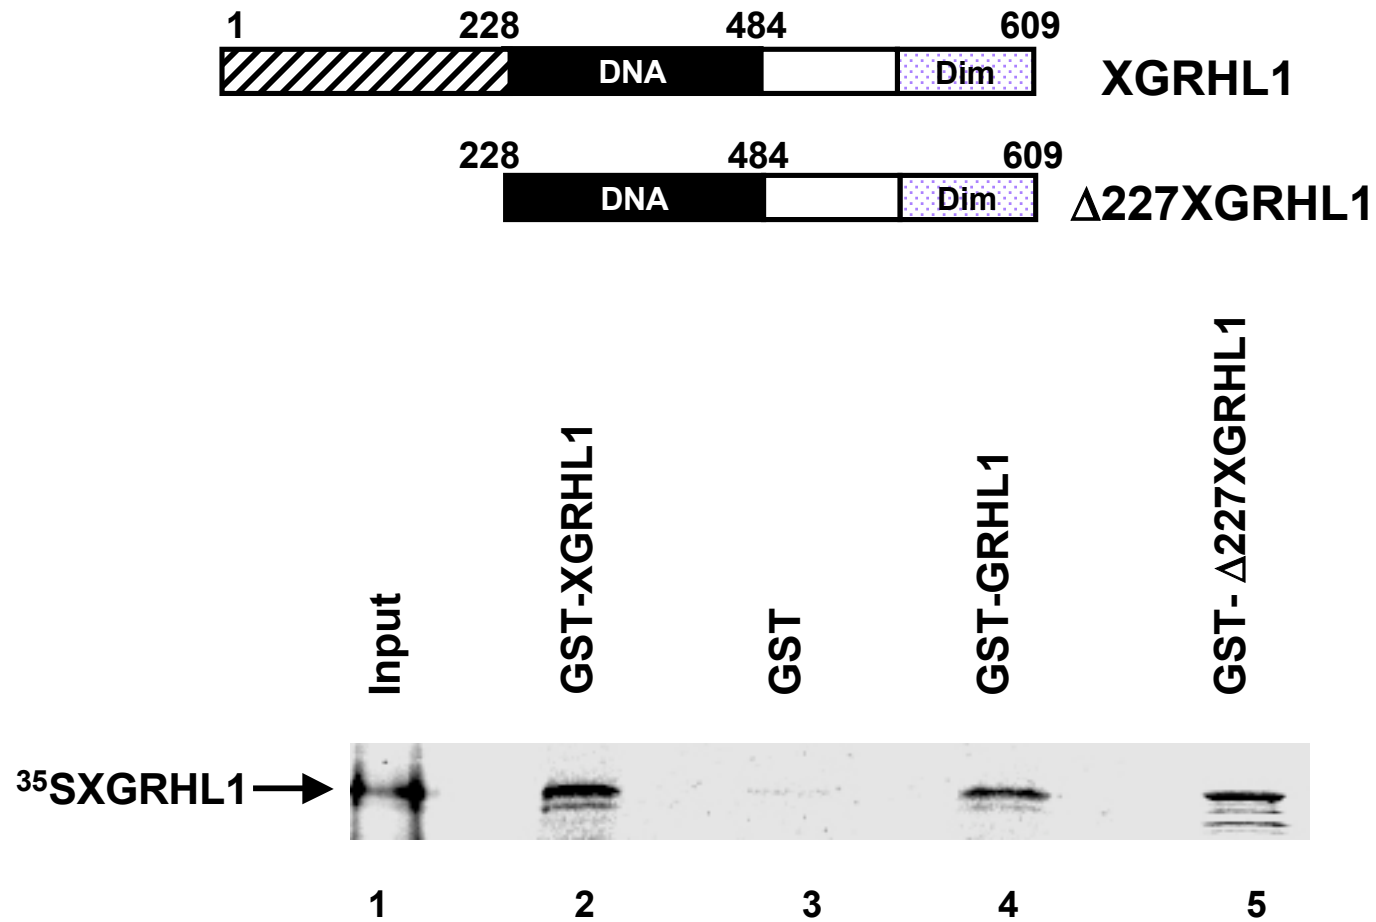

**B.**

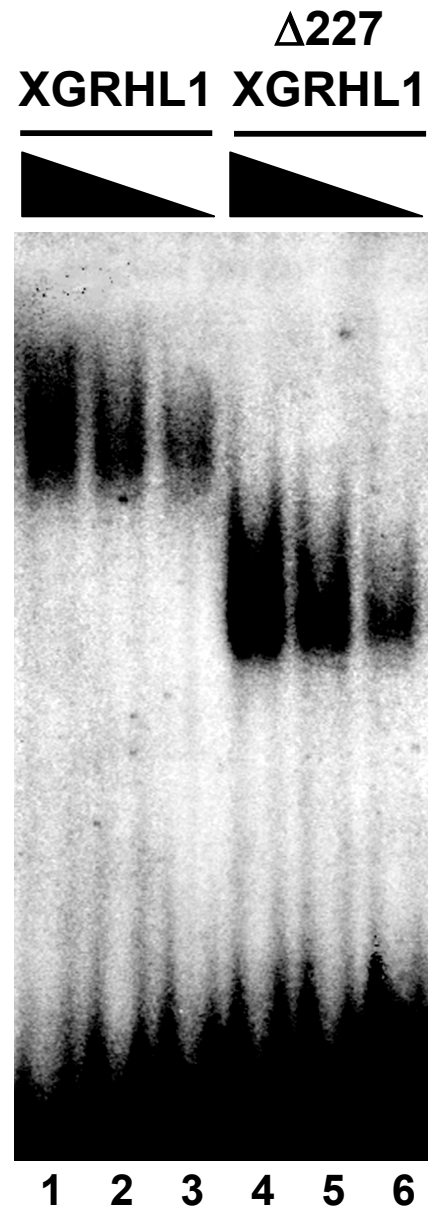

**C.**

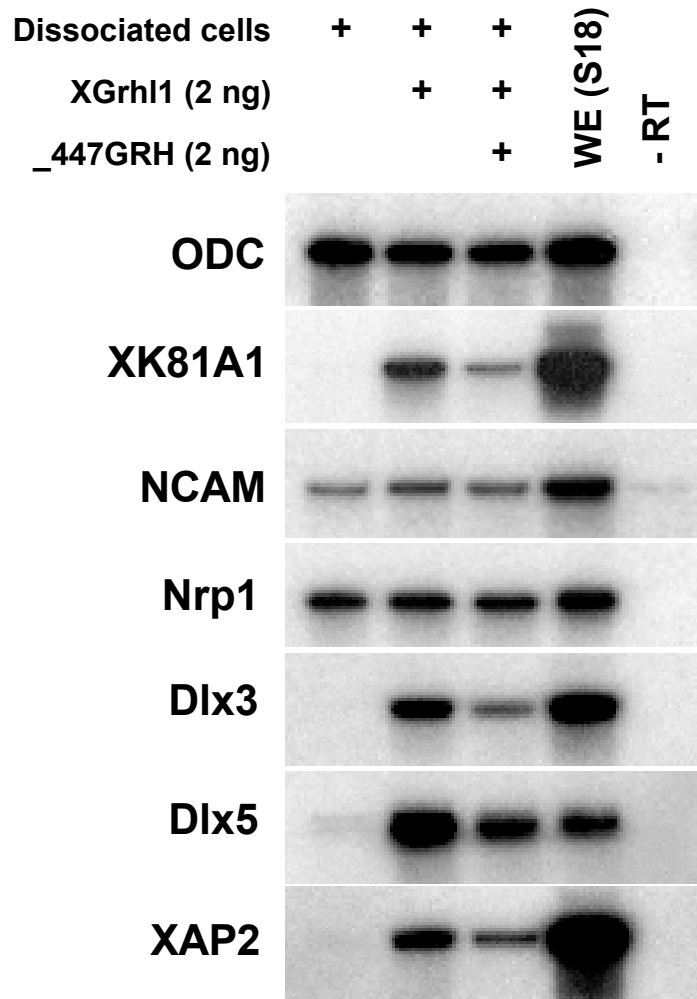

**D.**

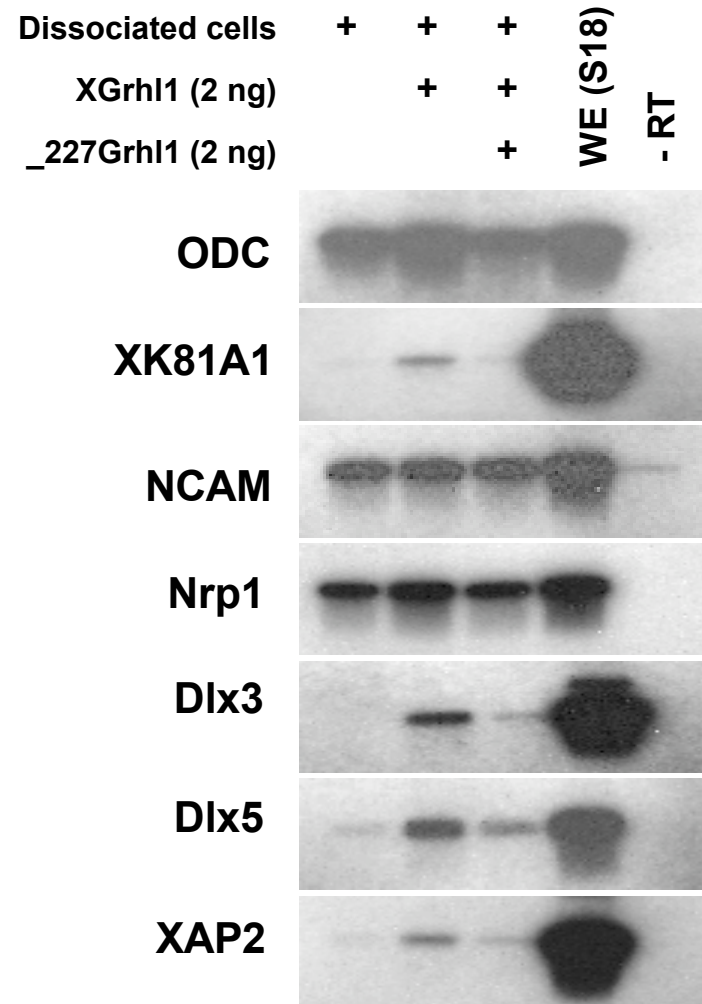

**A.**

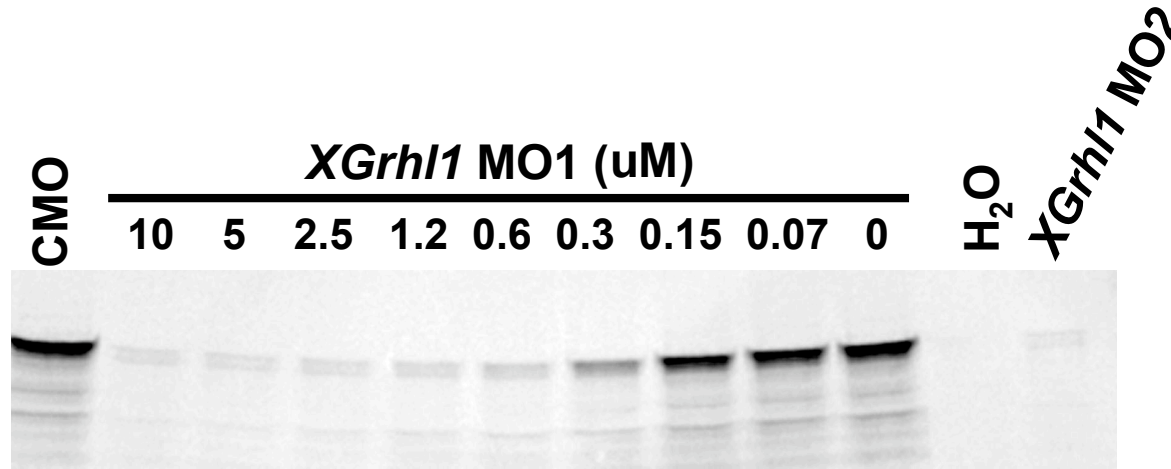

**B.**

Wt XGrhl1 mRNA    AUGACACAAGACUACGACAAUAAAC

M- XGrhl1 mRNA    AUGACACAGGAUUAUGAUACAAGC

M   T   Q   D   Y   D   N   K

|                  | <i>M-XGr</i> |   | <i>WtXGr</i> |   | <i>Wt XGr</i> | H <sub>2</sub> O |
|------------------|--------------|---|--------------|---|---------------|------------------|
| <b>CMO</b>       | +            | - | +            | - | -             | -                |
| <b>XGrhl1 MO</b> | -            | + | -            | + | -             | -                |

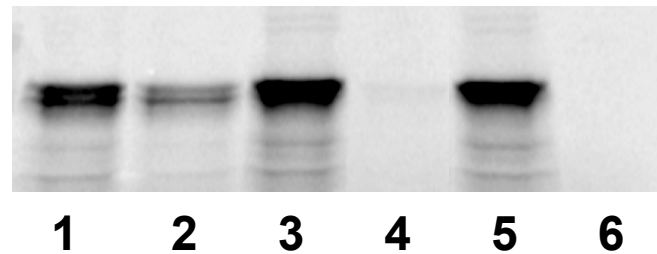



**C.**

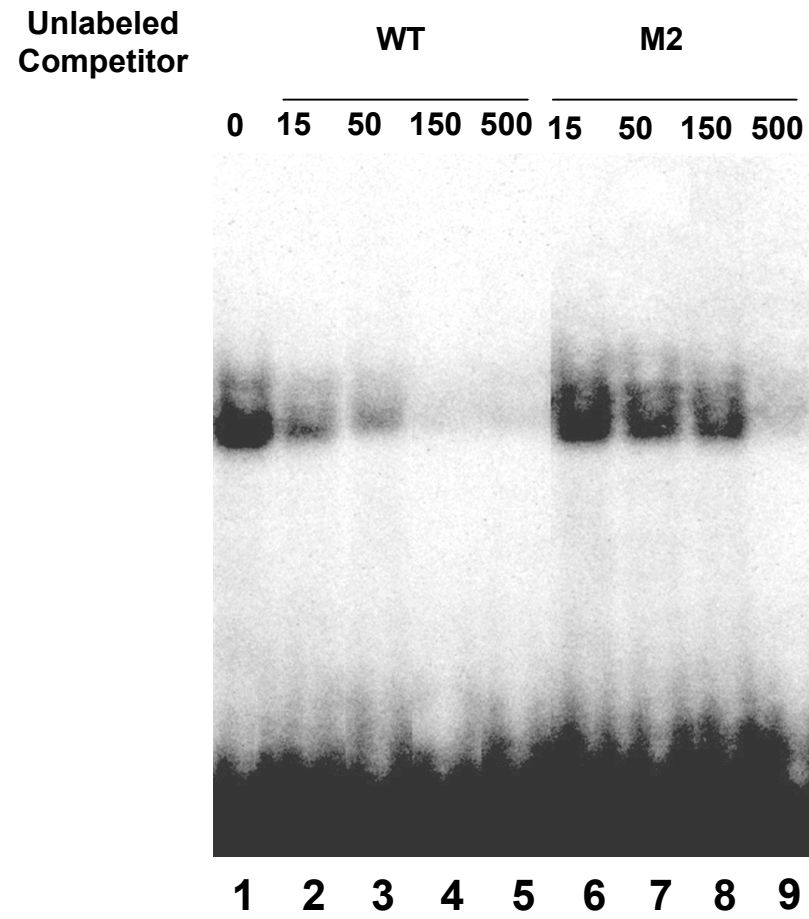

Source: https://cob.silverchair-cdn.com/cob/content_public/journal/dev/132/5/10.1242_dev.01641/6/dev01641.pdf
